# Supplementary material for: Simulating the feedback between corrosive gas generation and water availability for the evaluation of radionuclide mobility in the context of radioactive waste disposal
Source: Copernicus journal article supplement (doi:10.5194/sand-1-109-2021), 2021-11-10
Supplement: Supplementary file 1 [file sand-1-109-2021-supplement.pdf]

Supplement of Saf. Nucl. Waste Disposal, 1, 109–110, 2021  
<https://doi.org/10.5194/sand-1-109-2021-supplement>  
© Author(s) 2021. CC BY 4.0 License.

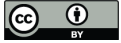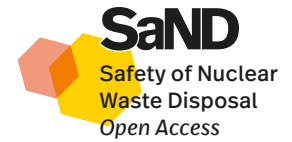

*Supplement of*

## **Simulating the feedback between corrosive gas generation and water availability for the evaluation of radionuclide mobility in the context of radioactive waste disposal**

**Laurin Wissmeier and Joachim Poppei**

*Correspondence to:* Laurin Wissmeier ([l.wissmeier@csd.ch](mailto:l.wissmeier@csd.ch))

The copyright of individual parts of the supplement might differ from the article licence.

# Simulating the feedback between corrosive gas generation and water availability for the evaluation of radionuclide mobility in the context of radioactive waste disposal

safeND Interdisciplinary Research Symposium  
10.11.2021 – 12.11.2021 Berlin  
Laurin Wissmeier, Joachim Poppei, Gerhard Mayer

# The importance of gas generation for radioactive waste disposal

---

- + May affect the mobility of dissolved and volatile radionuclides through changes in phase saturation
- + May affect mobility of dissolved and volatile radionuclides through changes in geochemical conditions (Eh,  $\text{pH}_m$ , etc.)
- + May induce advective transport
- + May affect the mechanical stability of the host rock and open up dilatant transport pathways
- + May affect the integrity of technical and geotechnical barriers

# Perception of gas generation as kinetic geochemical reactions

Cellulose oxidation by molecular oxygen (c\_o)  
 Cellulose oxidation by nitrate (c\_n)  
 Cellulose oxidation by sulfate reduction (c\_s)  
 Cellulose oxidation by Fe(III) reduction (c\_f)  
 Methane generation from cellulose (c\_m)  
 Plastics oxidation by molecular oxygen (p\_o)  
 Plastics oxidation by nitrate (p\_n)  
 Plastics oxidation by sulfate reduction (p\_s)  
 Plastics oxidation by Fe(III) reduction (p\_f)  
 Methane generation from plastics (p\_m)  
 Hydrogen oxidation by Fe(III) reduction (h\_o)  
 Hydrogen oxidation by CO2 reduction (h\_m)  
 Hydrogen oxidation by sulfate reduction (h\_s)

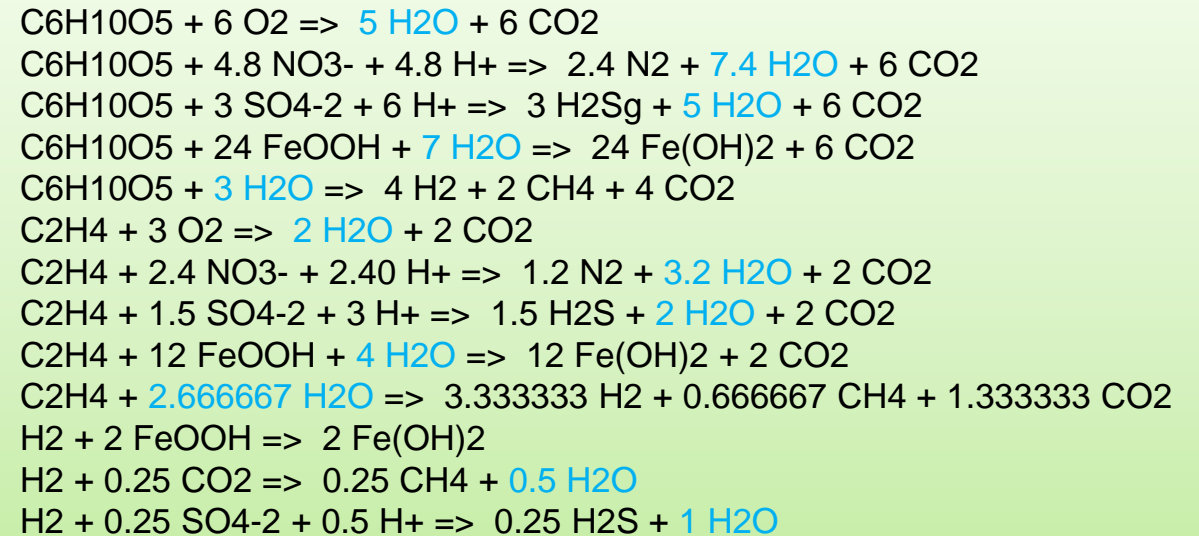

Aerobe corrosion of C-steel (cs\_o)  
 Anaerobe corrosion of C-steel (cs\_h)  
 Reduction of Fe(III) with C-Steel (cs\_r)  
 Aerobe corrosion of stainless steel (ss\_o)  
 Anaerobe corrosion of stainless steel (ss\_h)  
 Reduction of Fe(III) with stainless steel (ss\_r)  
 Oxidation of Fe(II) with hydrogen (Schikorr reaction) (fe\_sch)  
 Iron sulfide precipitation (fe\_sul)  
 Anaerobe corrosion of aluminium (al\_h)

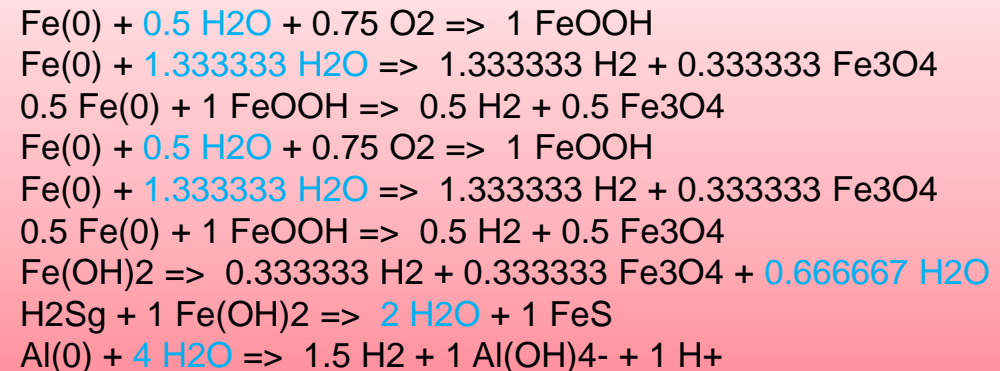

# Feedback of corrosive gas generation and water availability

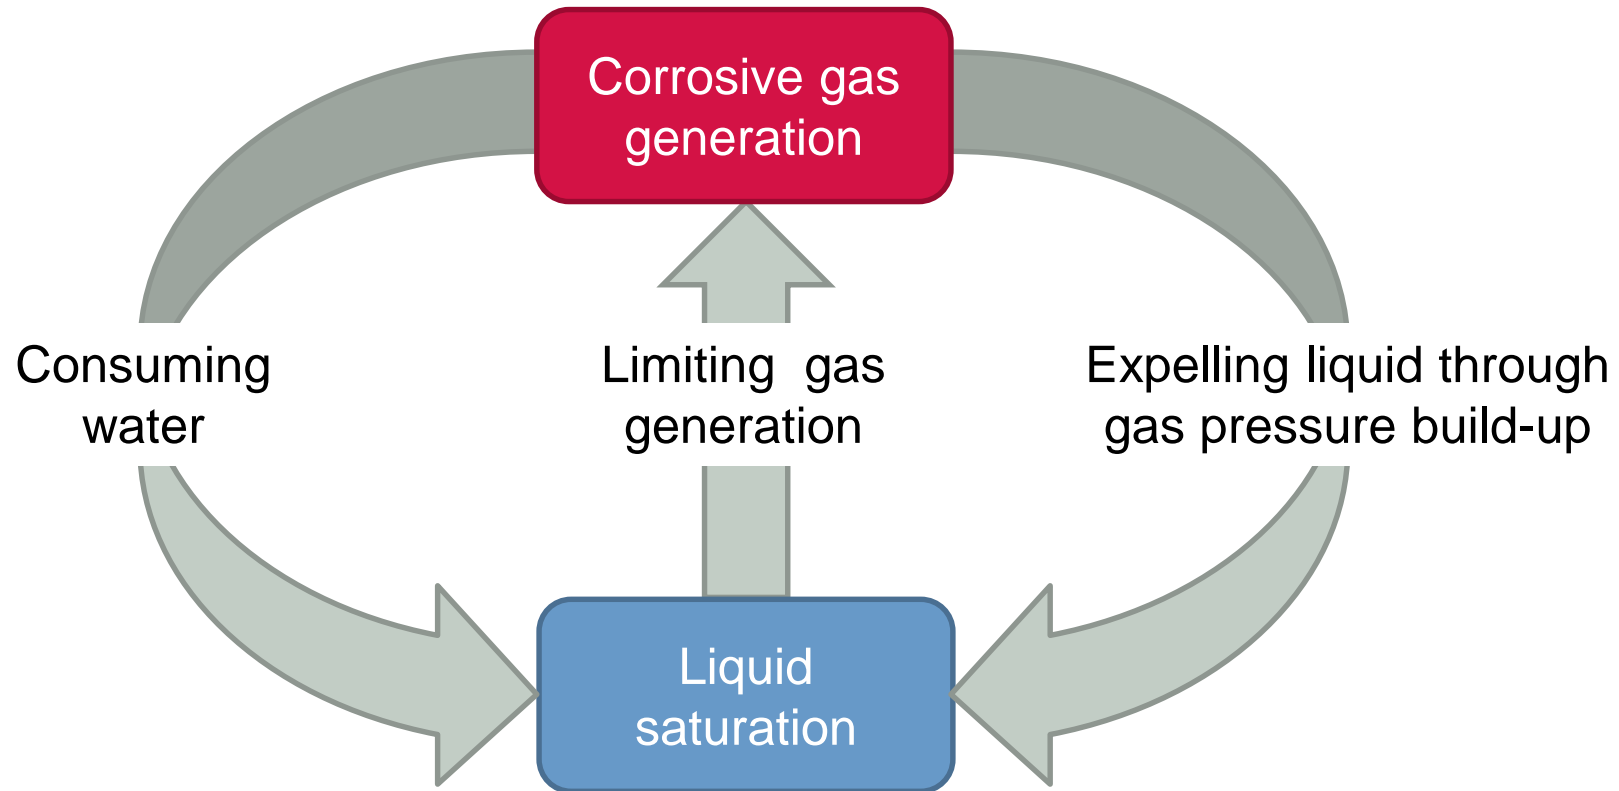

# Literature overview

- + Xu et al. (2008): Corrosion-induced gas generation in a nuclear waste repository: Reactive geochemistry and multiphase flow effects. *Applied Geochemistry*, 23, 3423–3433. doi:[10.1016/j.apgeochem.2008.07.012](https://doi.org/10.1016/j.apgeochem.2008.07.012)
- + Croisé et al. (2011): Impact of water consumption and saturation-dependent corrosion rate on hydrogen generation and migration from an intermediate-level radioactive waste repository. *Transport in Porous Media*, 90, 59–75. doi:[10.1007/s11242-011-9803-0](https://doi.org/10.1007/s11242-011-9803-0)
- + Leupin et al. (2016): An assessment of the possible fate of gas generated in a repository for low- and intermediate-level waste. Nationale Genossenschaft für die Lagerung radioaktiver Abfälle (NAGRA), Nagra Working Report, NTB 16-05.
- + Huang et al. (2021): Two-phase transport in a cemented waste package considering spatio-temporal evolution of chemical conditions. *npj Materials Degradation*, 5, 4. doi:[10.1038/s41529-021-00150-z](https://doi.org/10.1038/s41529-021-00150-z)

# What's new

---

- + Implementation in PFLOTRAN: A Massively Parallel Reactive Flow and Transport Model for Describing Surface and Subsurface Processes
- + Application to radioactive waste management in salt host rock

# PFLOTRAN

- + A massively parallel reactive flow and transport model for describing surface and subsurface processes
  - Multicomponent 2-Phase flow: GENERAL mode
  - 2-phase water and supercritical CO<sub>2</sub> flow: MPHASE mode
- + Designed *ab initio* with reactive transport capabilities
- + Designed for application to salt host rock
  - Intended as replacement for several other codes currently used in the periodic performance assessment and recertification process for the WIPP
- + Developed in close cooperation with the team behind the PETSc solver suite
- + Developed by consortium of Los Alamos National Lab, Oak Ridge National Lab, Pacific Northwest National Lab and Sandia National Labs
- + The code is open source; available at <https://bitbucket.org/pflotran/pflotran/wiki/Home>



# Reaction equations

- + Simplified anoxic iron corrosion reaction with Magnetite as corrosion product:

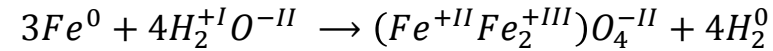

- + Conceptualized as kinetic reaction with rate:

$$r_0 = \frac{dm_{Fe^0}}{dt} = \frac{k \cdot A \cdot \rho_{Fe^0}}{M_{Fe^0}}$$

- + Linear reduction of corrosion rate at onset:

$$r_1 = r_0 \cdot \begin{cases} 9.1 - 9 \cdot m_{Fe} & 0.9 \cdot m_{Fe_0^0} \leq m_{Fe} < m_{Fe_0^0} \\ 1 & m_{Fe} \leq 0.9 \cdot m_{Fe_0^0} \end{cases}$$

- + Linear reduction of corrosion rate with decreasing liquid content (similar reduction with depletion of iron inventory):

$$r_2 = r_1 \cdot \begin{cases} 0 & S_l \leq S_{l,1} \\ \frac{S_l - S_{l,1}}{S_{l,2} - S_{l,1}} & S_{l,1} < S_l < S_{l,2} \\ 1 & S_l \geq S_{l,2} \end{cases}$$

- + Differentiation of 3 different iron pools with different  $Fe_0^0$ , different  $A_0$  and different  $k$

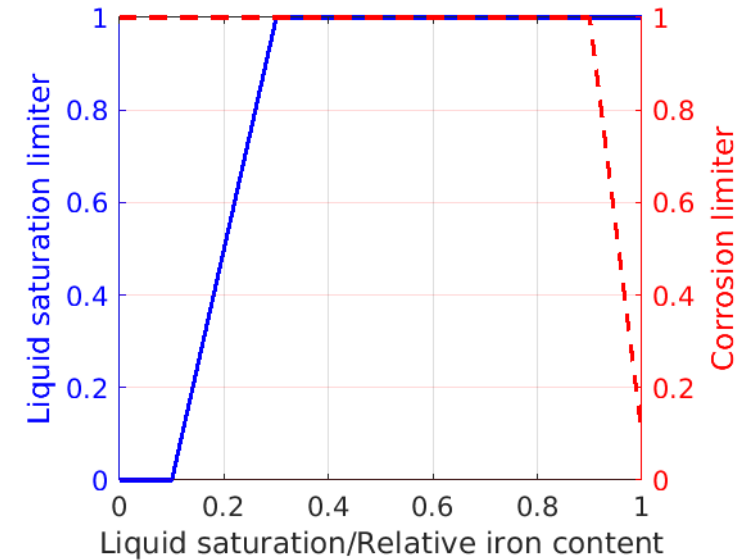

# Implementation in PFLOTRAN

- + Using object-oriented coding provisions with encapsulation, inheritance, and polymorphism in PFLOTRAN for user-defined source/sink terms: SRC\_SINK\_SANDBOX
- + SRC\_SINK\_SANDBOX: Fortran 90 class with access to all important process variables
- + Adapting directly the residuals in the numerical solution for the gas and liquid phases as well as temperature
- + Output of process variables to result files (HDF5, ASCII etc.)
- + Direct visualization in Tecplot, VisIt and ParaView

```

MAW-GAS_GENERATION
CELL_ID 4801
WASTE1_IRON # kmol/m3
WASTE1_CORROSION_RATE # kmol/m3/s
WASTE2_IRON # kmol/m3
WASTE2_CORROSION_RATE # kmol/m3/s
DRUM_IRON # kmol/m3
DRUM_CORROSION_RATE #kmol/m3/s
WC_LIM 0.3
WC_MIN 0.1
END
  
```

# Application example

- + Simulation modified on the basis of benchmark calculations between TOUGH2 and PFLOTRAN
- + Original simulations published in Namhata, A., Li, C., Papafotiou, A.: Model-based assessment of repository induced effects in the vicinity of repositories for SF/HLW. In Management of Spent Fuel from Nuclear Power Reactors, IAEA, International Atomic Energy Agency (IAEA). ISBN 0074-1884
- + Emplacement tunnel in clay host rock with
  - Steel canister and iron reinforcement
  - 2 types of Bentonite backfill
  - Stylized EDZ
  - Confining units
  - Rectangular 2D grid with octree grid refinement

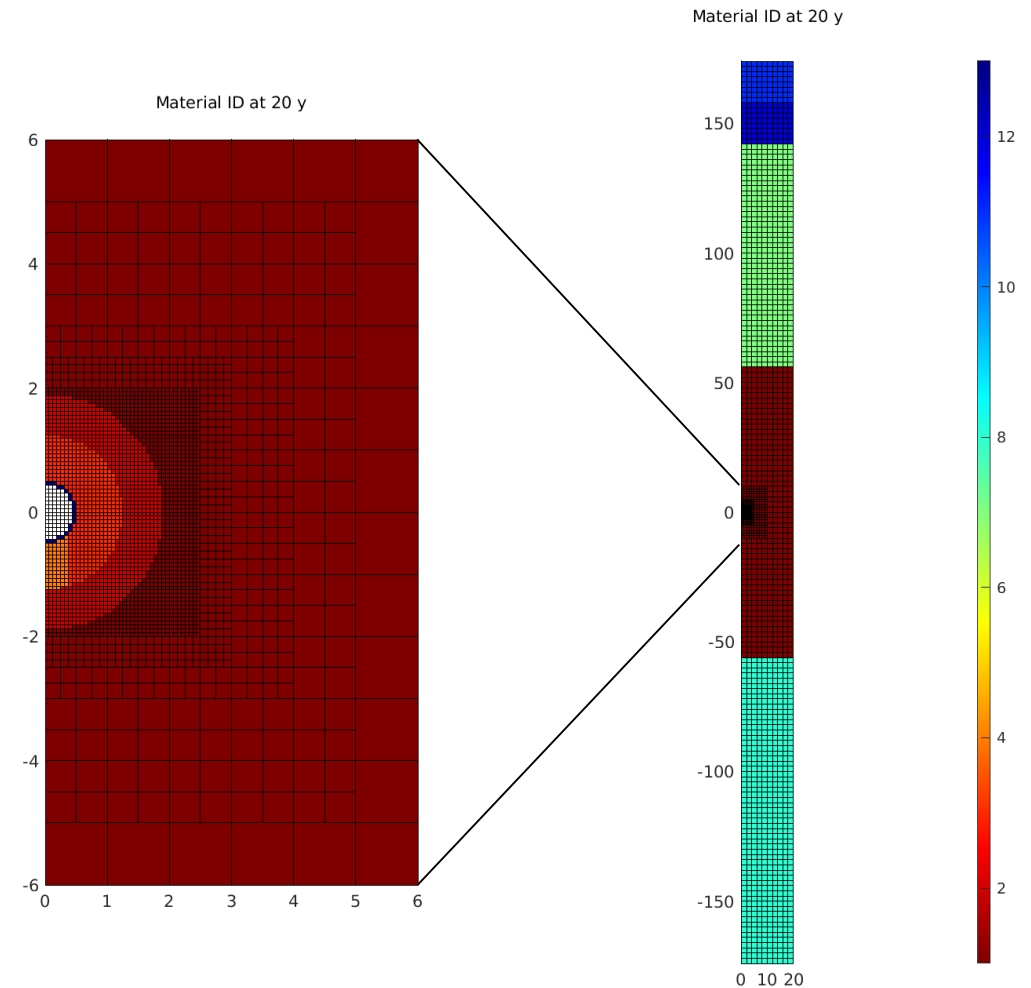

# Comparison of model results with and without water consumption for different locations

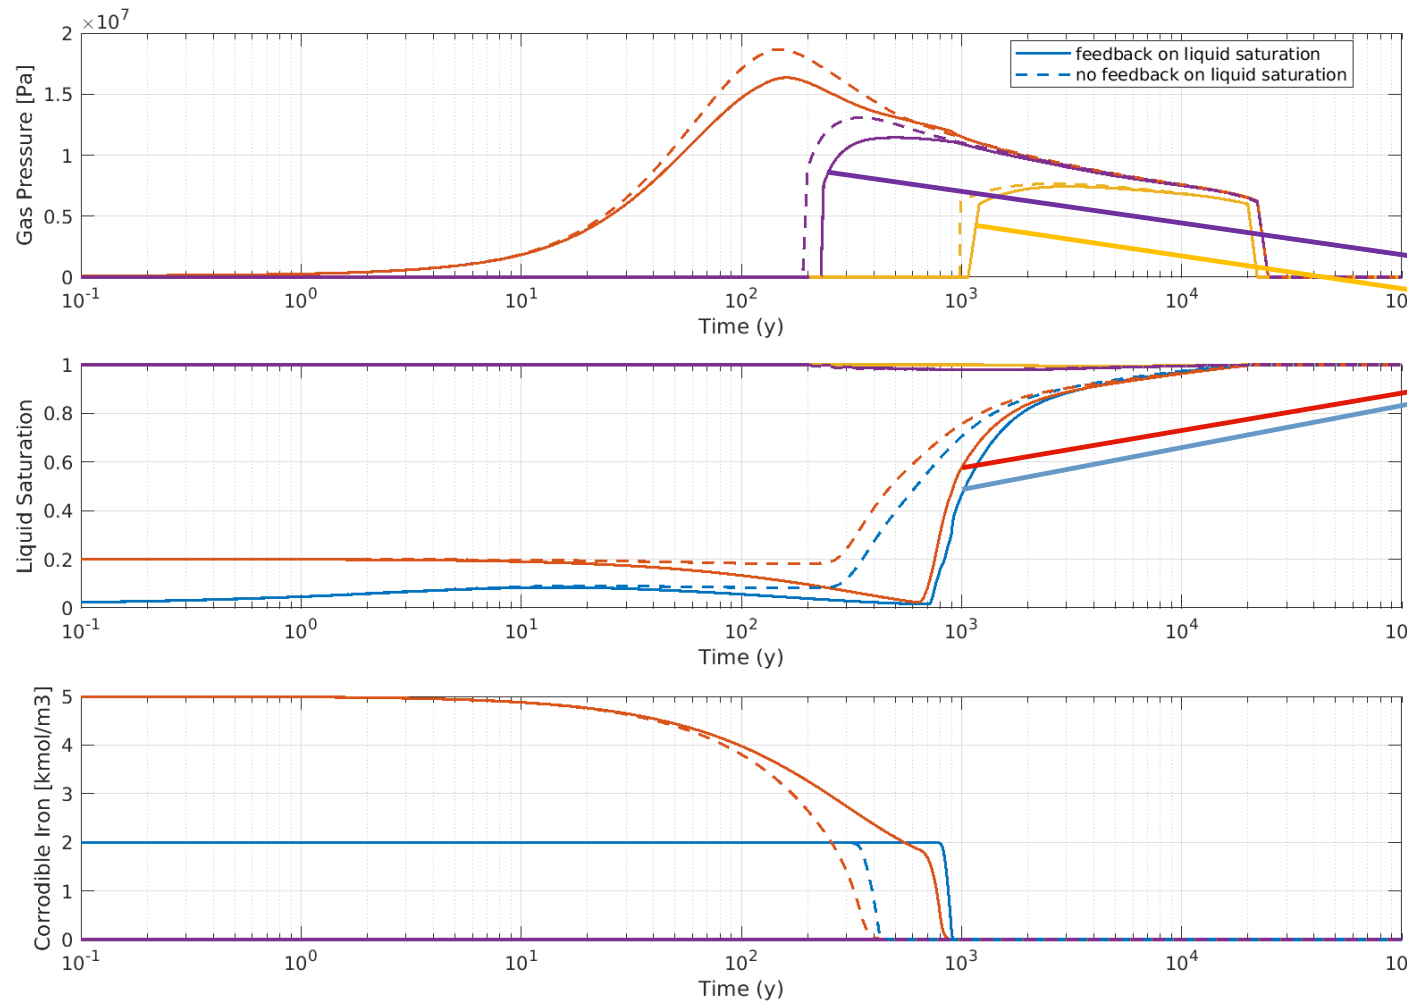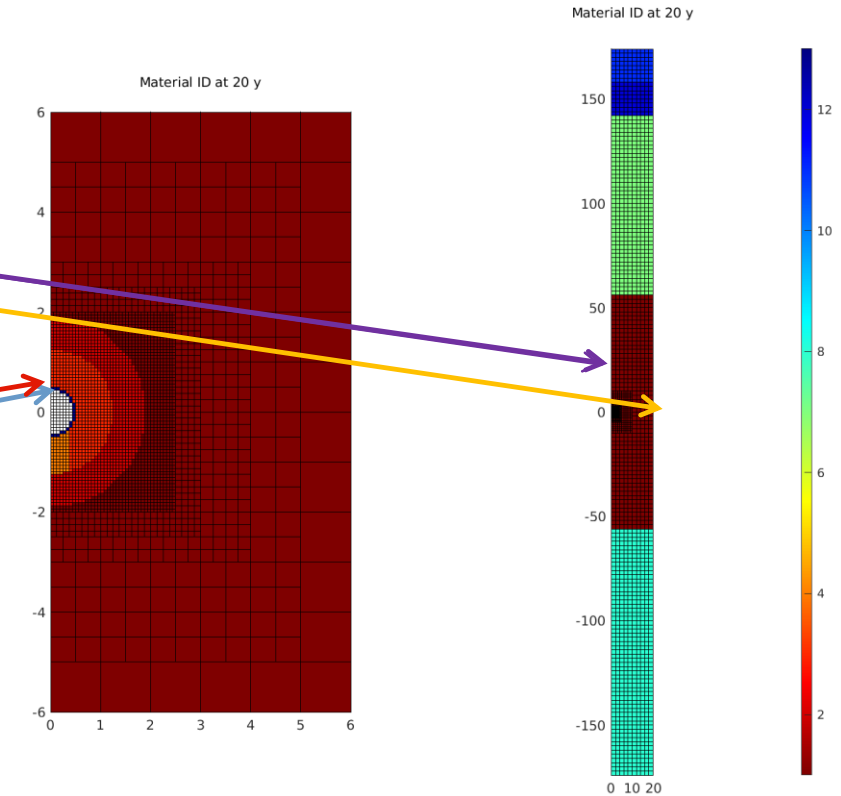

# Comparison of model results: Evolution of corrodible iron content

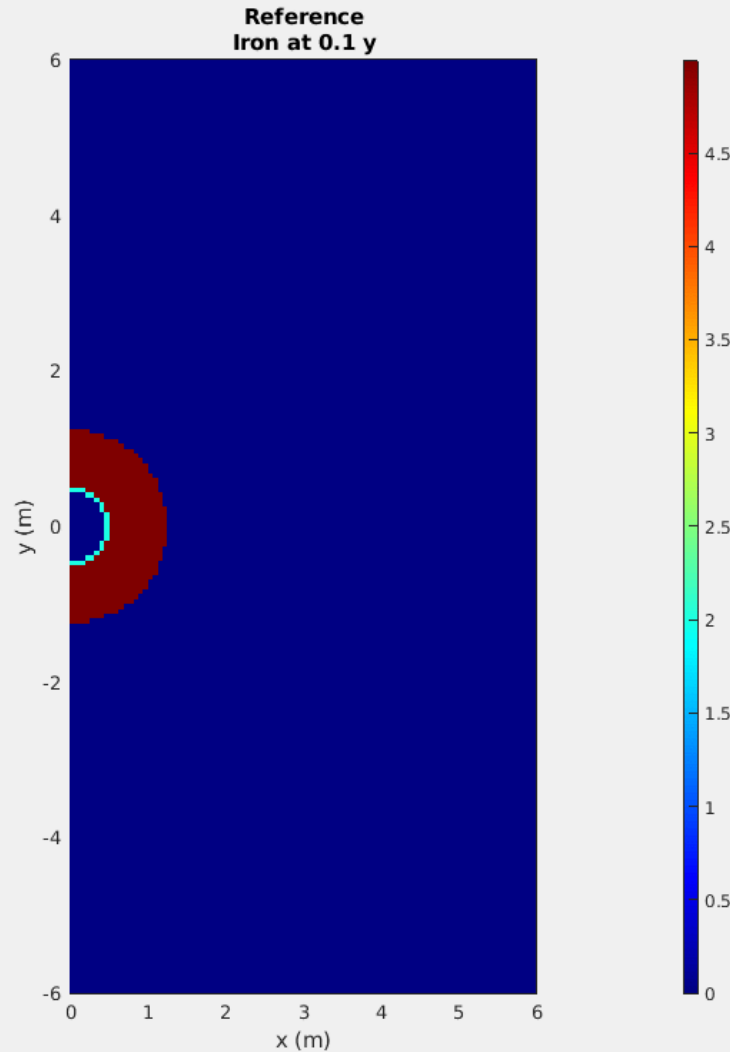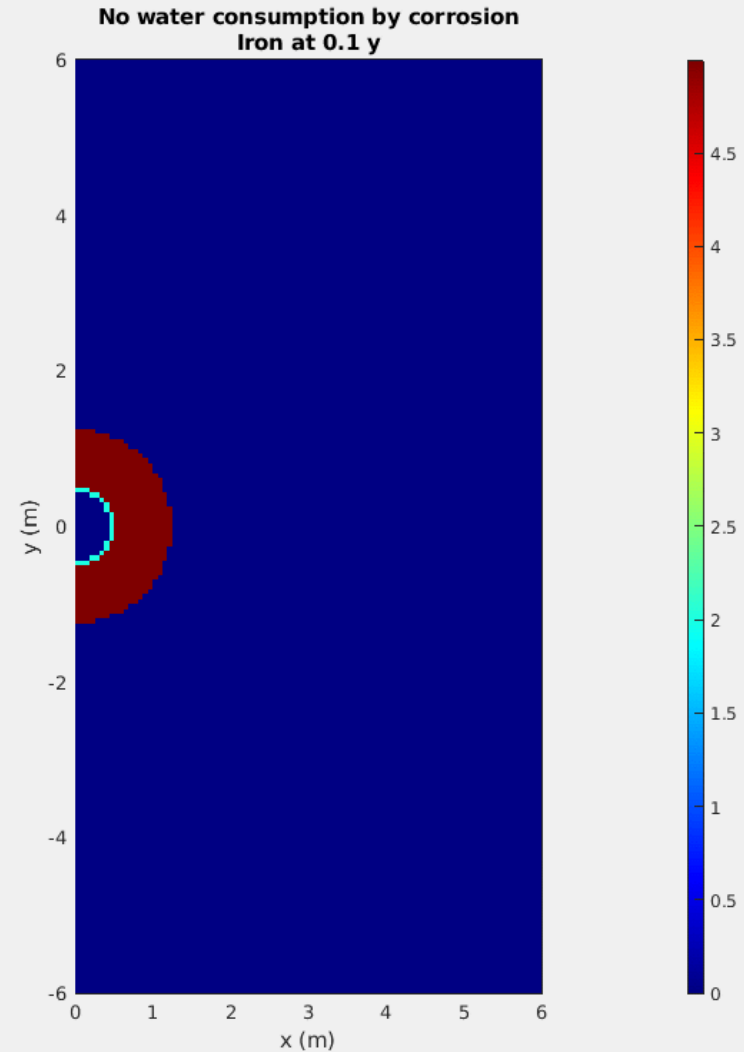

# Comparison of model results: Evolution of liquid saturation

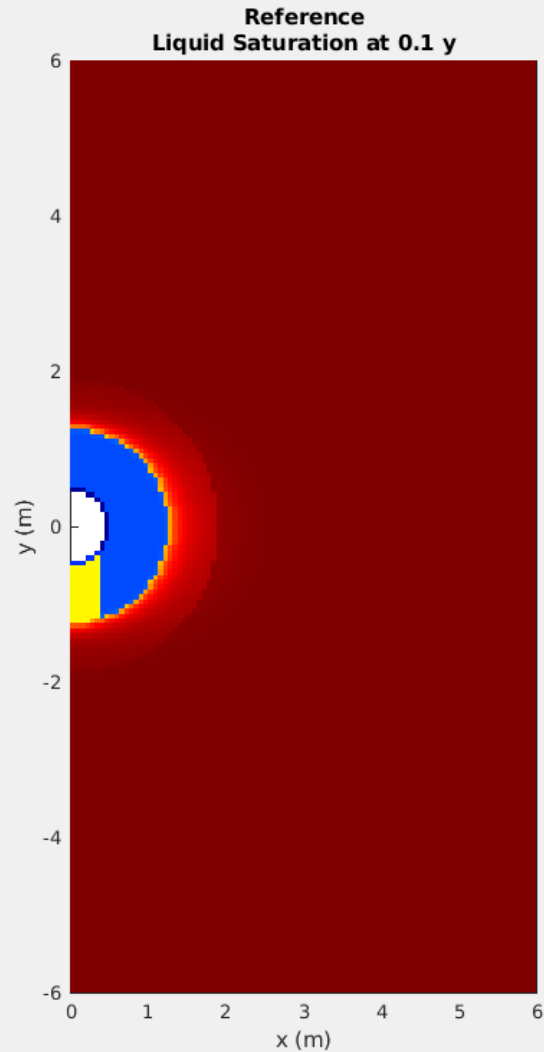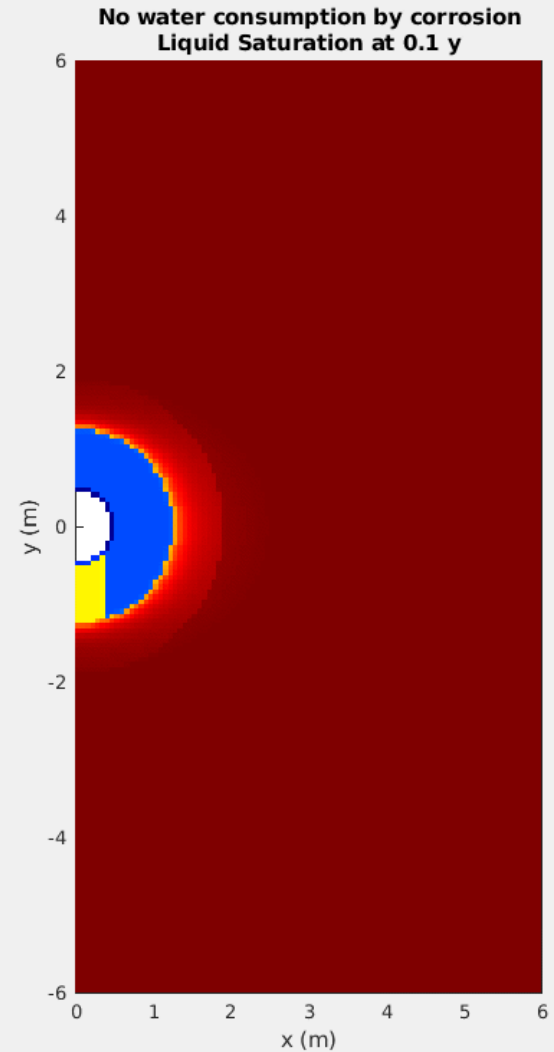

# Comparison of model results: Evolution of gas pressure

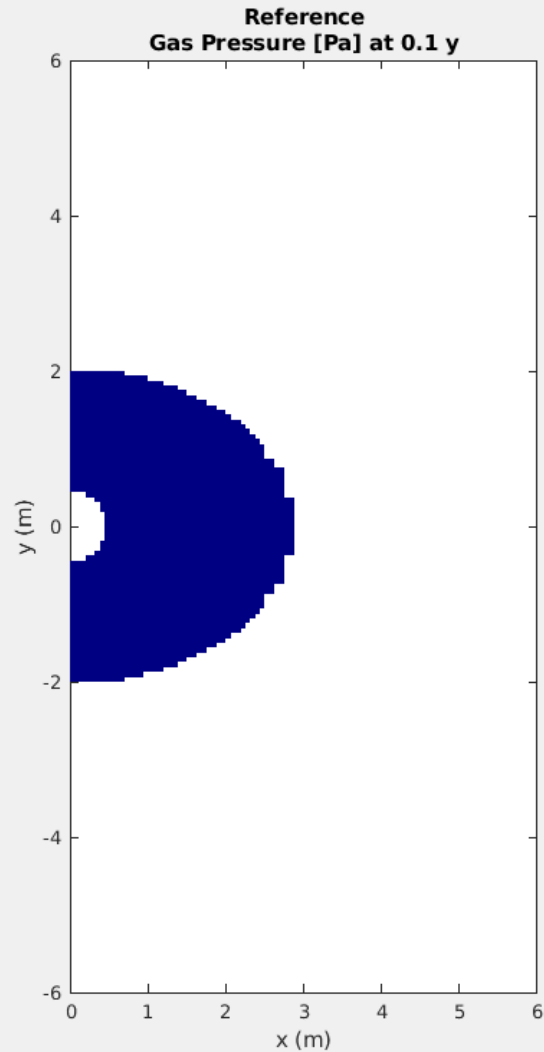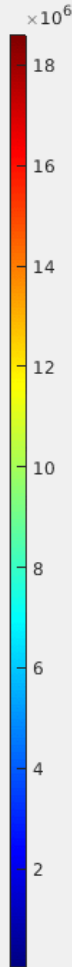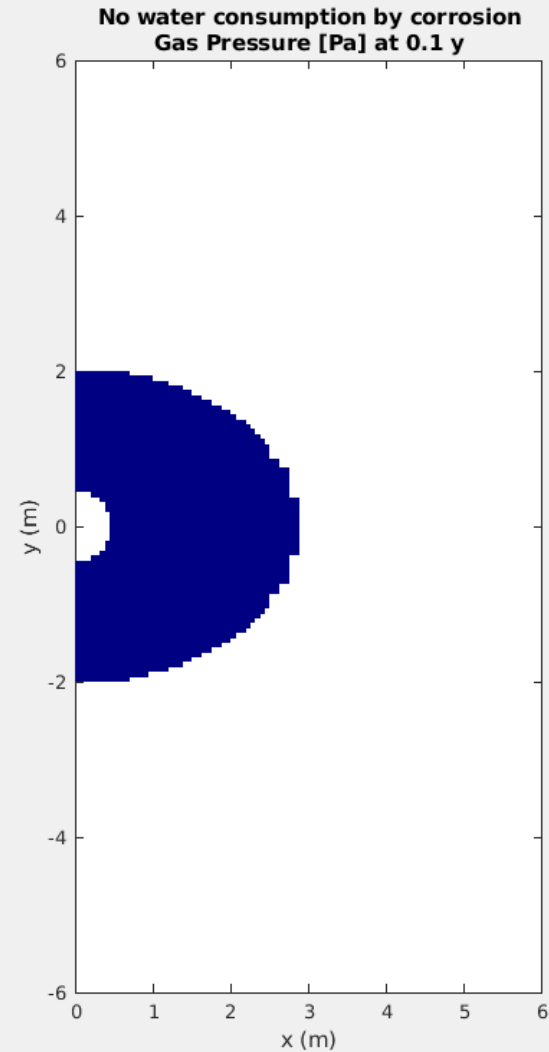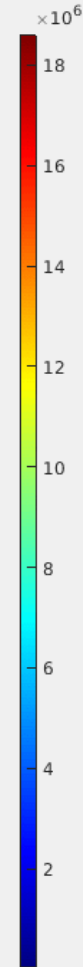

# Summary

---

- + We have shown the importance to consider also water as educt / product of gas generating reactions in the context of 2-phase flow simulations
- + We have detailed the implementation of water consuming anoxic corrosion into the flow and reactive transport simulator PFLOTRAN
- + We have given an application example for a generic repository layout
- + For further information, send an e-mail to:

[I.wissmeier@csd.ch](mailto:I.wissmeier@csd.ch)

Thank you for your attention!
